# Supplementary material
Source: PubMed Central journal article supplement (PMC5531053)

**Hematoxylin and Eosin**

**Mason's Trichrome**

**Zone 1**

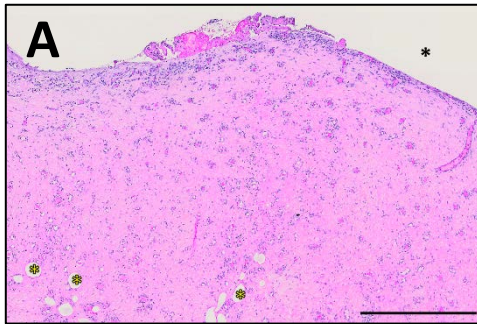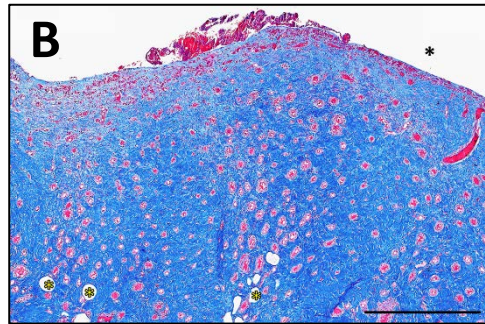

**Zone 2**

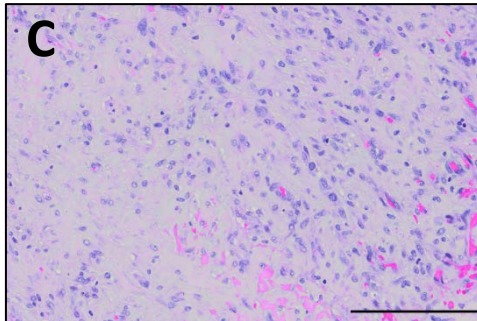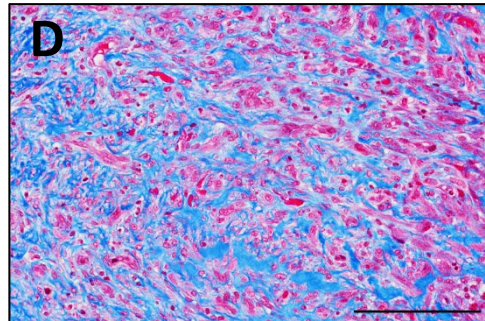

**Zone 3**

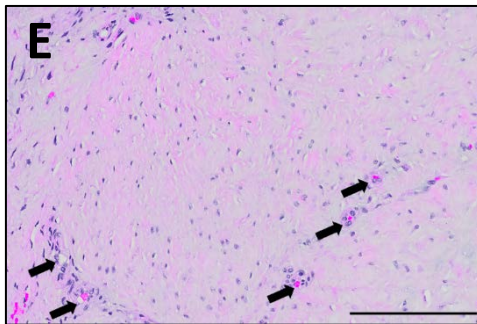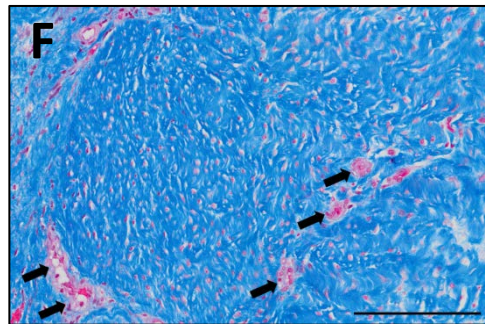

**Thy1 Immunohistochemistry with hematoxylin counter stain**

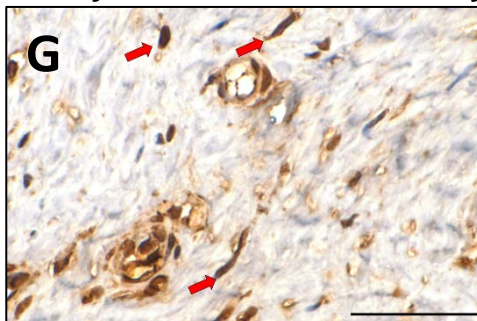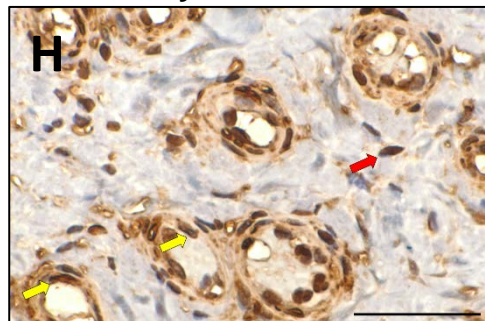

Supplement: NIHMS862493-supplement-Supplemental_Digital_Content_1.pdf [file NIHMS862493-supplement-Supplemental_Digital_Content_1.pdf]
